# Supplementary material for: Chemistry of catalytic cracking of cyclohexene and 1-methylcyclopentene
Source: Royal Society of Chemistry journal article supplement (doi:10.1039/d5re00033e), 2025-01-01
Supplement: d5re00033e1.pdf [file d5re00033e1.pdf]

## Chemistry of catalytic cracking of cyclohexene and 1-methylcyclopentene

*Xueqian Zhang, <sup>a</sup>Jiasong Yan, \* <sup>a</sup> Shuai Yuan, <sup>a</sup>Shanqing Yu, <sup>a</sup>Qingyu Liu, <sup>a</sup>Xikai Wang <sup>a</sup>  
and Rui Li <sup>b</sup>*

a. SINOPEC Research Institute of Petroleum Processing Co., Ltd., Beijing 100083, China.

b. State Key Laboratory of Heavy Oil Processing; The Key Laboratory of Catalysis of CNPC; College of Chemical Engineering and Environment, China University of Petroleum, Beijing 102249, China.

\*E-mail: [yanjs.ripp@sinopec.com](mailto:yanjs.ripp@sinopec.com);

## Supporting Information

### Contents

1. Supplementary Table S1

**Table S1. Distribution of low-carbon small molecule hydrocarbon and aromatic products from the cracking reaction of 2 wt% cyclohexene and 2 wt% 1-methylcyclopentene**

| Reactant | Product Yield, % |           |          |               |         |
|----------|------------------|-----------|----------|---------------|---------|
|          | Ethylene         | Propylene | Butylene | 1,3-Butadiene | Benzene |
| CHE      | 2.48             | 8.77      | 8.54     | 0.36          | 2.33    |
| 1-MCPE   | 2.59             | 9.68      | 8.61     | 0.35          | 2.04    |
